# Supplementary material for: An in situ electrochemical detection method of cell viability
Source: Royal Society of Chemistry journal article supplement (doi:10.1039/c3an00379e), 2013-01-01
Supplement: c3an00379e.pdf [file c3an00379e.pdf]

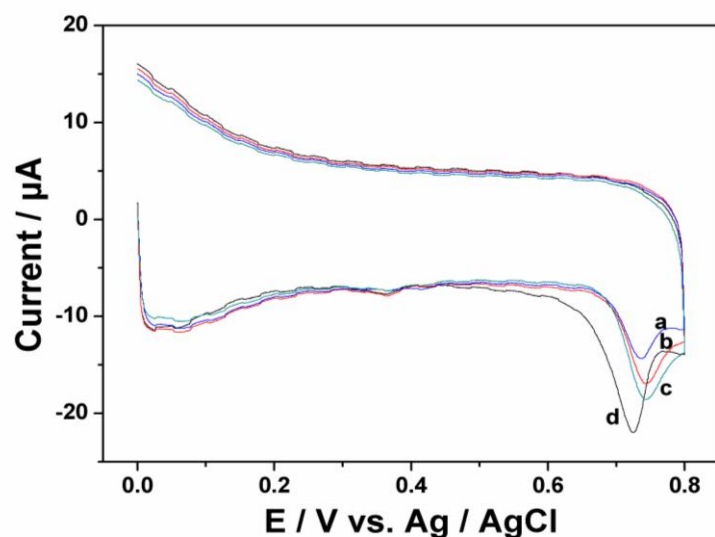

**Fig.S1** Cyclic voltammograms of (a) 3.5 μg mL<sup>-1</sup> xanthine in pH 7.4 PBS (b) 5.0 μg mL<sup>-1</sup> guanine in pH 7.4 PBS, (c) the mixture of 3.5 μg mL<sup>-1</sup> xanthine and 5.0 μg mL<sup>-1</sup> guanine in pH 7.4 PBS, (d) the fragmented MCF-7 cell suspension. Cell concentration, 3.5×10<sup>6</sup> cells mL<sup>-1</sup>

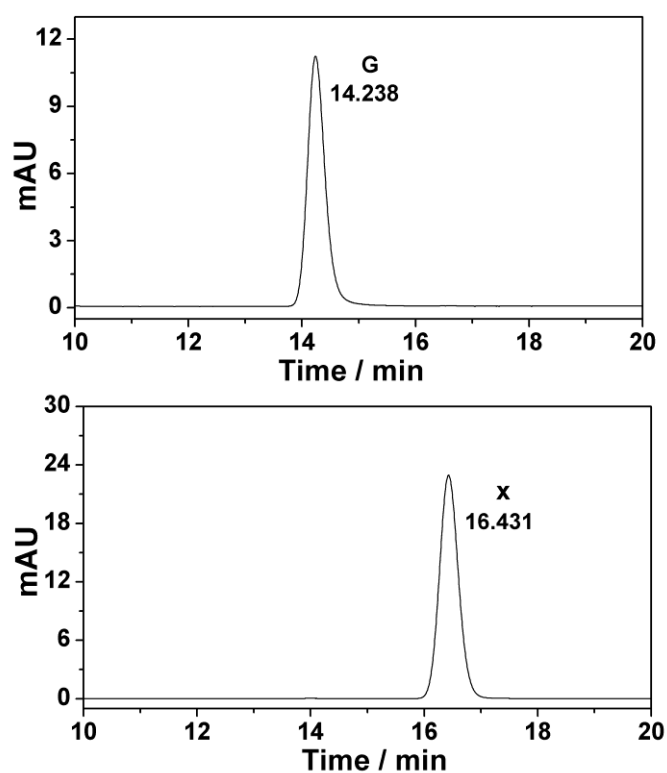

**Fig.S2** Chromatograms of 25 μg mL<sup>-1</sup> guanine and Chromatograms of 27 μg mL<sup>-1</sup> xanthine.

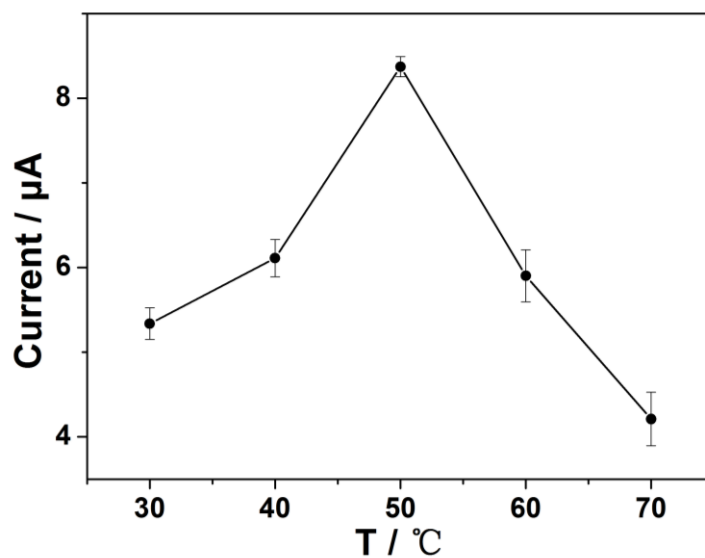

**Fig.S3** Influence of heat-treating temperature on the peak current value of the in-situ fragmented MCF-7 cell suspension. Cell concentration,  $2.5 \times 10^6$  cells  $\text{mL}^{-1}$ ; heating time, 30 min.

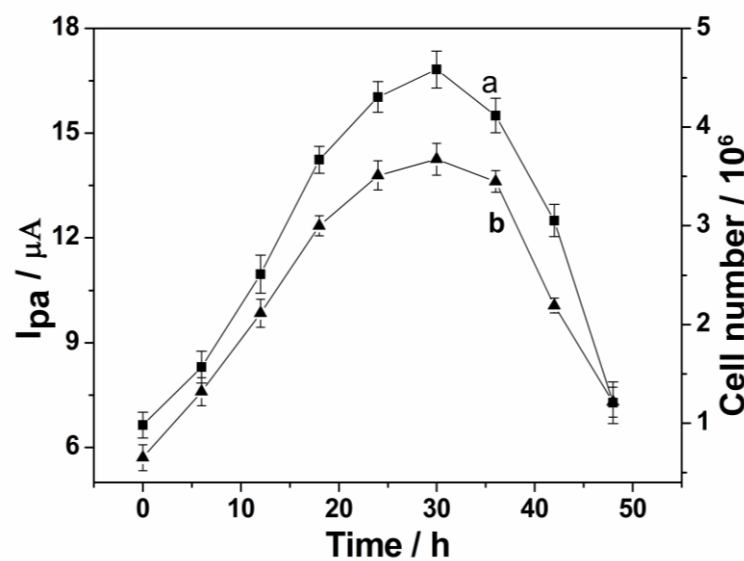

**Fig.S4** Cell growth curves described by (a) the electrochemical method, (b) the cell counting method. Cell inoculation concentration,  $6.5 \times 10^5$  cells  $\text{mL}^{-1}$ .

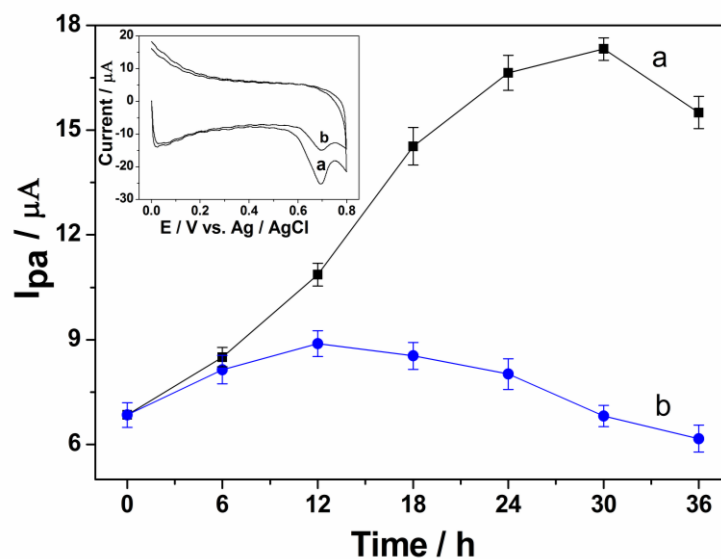

**Fig.S5** Dependence of the peak current of the in-situ fragmented MCF-7 cell suspension on the culture time in the (a) absence and (b) presence of 300 nM cyclophosphamide monohydrate. Inset: cyclic voltammograms of the fragmented MCF-7 cell suspension cultured for 30 h in the (a) absence and (b) presence of 300 nM cyclophosphamide monohydrate. Cell inoculation concentration,  $6.5 \times 10^5$  cells  $mL^{-1}$ .

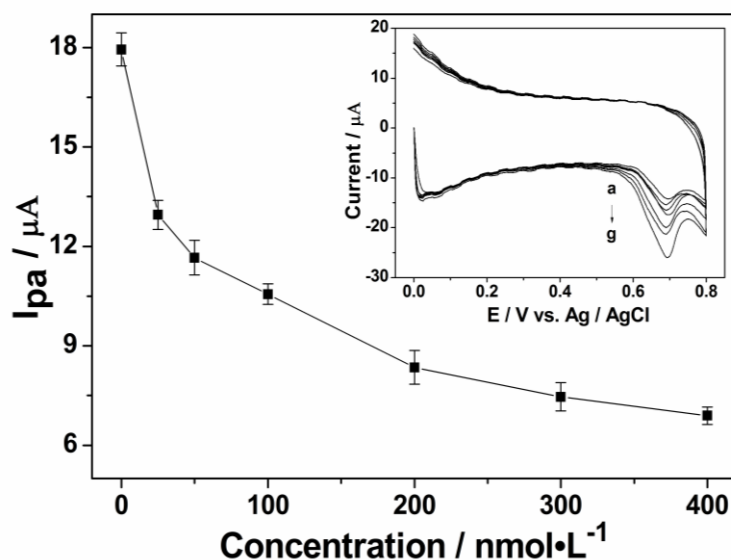

**Fig.S6** Dosage-dependent curve of cyclophosphamide monohydrate obtained by the in-situ electrochemical method. Inset: the cyclic voltammograms of the MCF-7 cell suspension treated with (a) 400 nM, (b) 300 nM, (c) 200 nM, (d) 100 nM, (e) 50 nM, (f) 25 nM, (g) 0 nM cyclophosphamide monohydrate. Cell inoculation concentration,  $6.5 \times 10^5$  cells  $mL^{-1}$ . Drug-treated time, 30 h.
